# Supplementary material for: Superior Technique for the Production of Agarose Dressing Containing Sericin and Its Wound Healing Property
Source: MDPI journal article supplement (doi:10.3390/polym13193370), 2021-09-30
Supplement: s1 [file s1]

**Table S1.** Band assignments for IR spectra of Sagarose, glycerin, and propylene glycol [79].

| Wavenumber (cm <sup>-1</sup> ) |          |                  | Band assignment                                                                    |
|--------------------------------|----------|------------------|------------------------------------------------------------------------------------|
| Agarose                        | Glycerin | Propylene glycol |                                                                                    |
| 3340                           | 3282     | 3314             | O–H str.                                                                           |
|                                |          | 2970             | asym. CH <sub>3</sub> str.                                                         |
| 2955                           | 2931     | 2930             | asym. CH <sub>2</sub> str.                                                         |
| 2899                           | 2878     | 2876             | sym. CH <sub>2</sub> str.; sym. CH <sub>3</sub> str.                               |
| 1636                           |          |                  | O–H def. vib.                                                                      |
| 1465                           |          |                  | CH <sub>2</sub> def. vib. (intensity affected by degree of crystallinity)          |
|                                |          | 1457             | asym. CH <sub>3</sub> def. vib.                                                    |
| 1413                           | 1413     | 1411             | CH <sub>2</sub> def. vib. (primary alcohols)                                       |
| 1368                           |          | 1374             | sym. CH <sub>3</sub> def.; CH def. vib. (secondary alcohols)                       |
|                                | 1327     | 1332             | CH <sub>2</sub> wagging vib. (primary alcohols); CH def. vib. (secondary alcohols) |
| 1252                           |          | 1287, 1232       | CH def. vib. (secondary alcohols)                                                  |
| 1151                           | 1108     | 1136, 1077       | C–O str. (secondary alcohols)                                                      |
| 1039                           | 1030     | 1039             | CCO str. (primary alcohols)                                                        |
| 966                            | 992      | 989              | CH <sub>2</sub> twisting vib. (primary alcohols)                                   |
|                                |          | 921              | CH <sub>3</sub> rocking vib.                                                       |
| 887                            | 850      | 839              | CCO str. (primary & secondary alcohols)                                            |
|                                |          | 803              | CCO str.                                                                           |
| 771                            |          |                  | ring vib.                                                                          |
